# Supplementary material for: Multiplex recombinase polymerase amplification assay developed using unique genomic regions for rapid on-site detection of genus Clavibacter and C. nebraskensis
Source: PubMed Central journal article supplement (PMC8187419; doi:10.1038/s41598-021-91336-7), 2021-06-08
Supplement: 41598_2021_91336_MOESM1_ESM.pdf [file 41598_2021_91336_MOESM1_ESM.pdf]

# Multiplex recombinase polymerase amplification assay developed using unique genomic regions for rapid on-site detection of genus *Clavibacter* and *C. nebraskensis*

Adriana Larrea-Sarmiento<sup>1</sup>, James P. Stack<sup>2</sup>, Anne M. Alvarez<sup>1</sup>, and Mohammad Arif<sup>1\*</sup>

<sup>1</sup>Department of Plant and Environmental Protection Sciences, University of Hawaii at Manoa, Honolulu, Hawaii - 96822, United States of America

<sup>2</sup>Department of Plant Pathology, Kansas State University, Manhattan, Kansas – 66506, United States of America

\*Corresponding author- Email: [arif@hawaii.edu](mailto:arif@hawaii.edu); Phone: +1-808-956-7765

## SUPPLEMENTARY INFORMATION

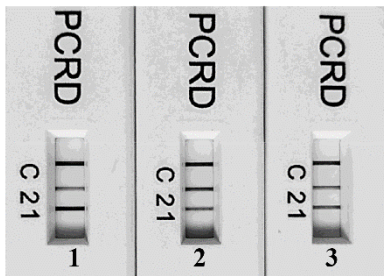

**Fig. S1.** RPA assay optimization for primer and probe concentration. Multiplex RPA reactions were performed following the provider instructions. *Clavibacter*-specific primer/probe concentrations were evaluated against *Cn*-specific primer/probe set. 1) low (*Cn* 1.2  $\mu$ L/1.4  $\mu$ L; *Clavibacter* 0.8  $\mu$ L /0.6  $\mu$ L); 2) equal (*Cn* 1.2  $\mu$ L/0.8  $\mu$ L; *Clavibacter* 1.2  $\mu$ L/0.8  $\mu$ L); and 3) high (*Cn* 1.5  $\mu$ L/0.9  $\mu$ L; *Clavibacter* 1.0  $\mu$ L/0.6  $\mu$ L).
